# Supplementary material for: Functionalized germanane/SWCNT hybrid films as flexible anodes for lithium-ion batteries
Source: Royal Society of Chemistry journal article supplement (doi:10.1039/d1na00189b), 2021-01-01
Supplement: d1na00189b1.pdf [file d1na00189b1.pdf]

## Supporting information

### Functionalized Germanane/SWCNTs Hybrid Films as Flexible Anodes for Lithium-ion Batteries

Bing Wu\*, Jiří Šturala, Martin Veselý, Tomáš Hartman, Evgeniya Kovalska, Daniel  
Bouša, Jan Luxa, Jalal Azadmanjiri, Zdenek Sofer\*

Department of Inorganic Chemistry, University of Chemistry and Technology Prague,  
Technická 5, 166 28 Prague 6, Czech Republic

\*Corresponding author. E-mail: soferz@vscht.cz ; wui@vscht.cz

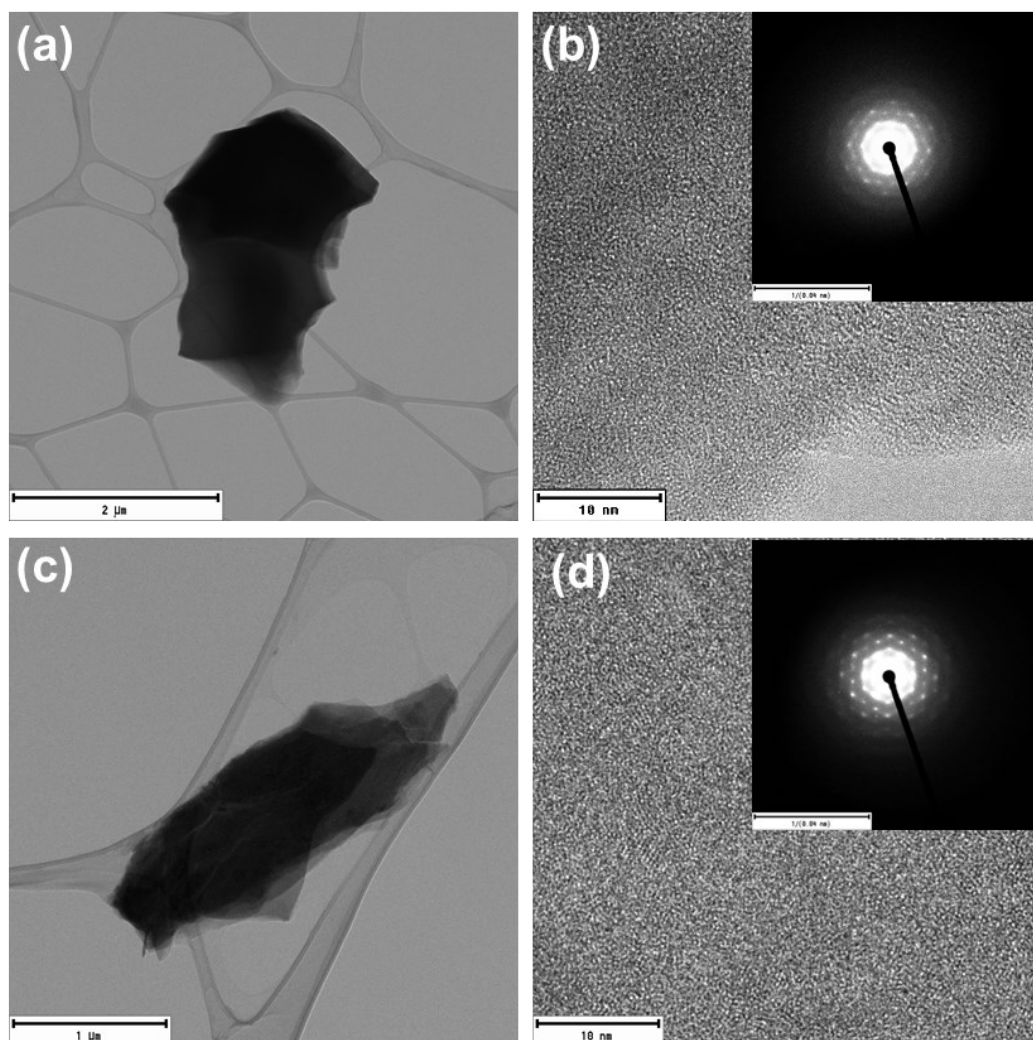

**Figure S1.** TEM and SAED of GeH (a-b) and GeCH<sub>3</sub> (c-d)

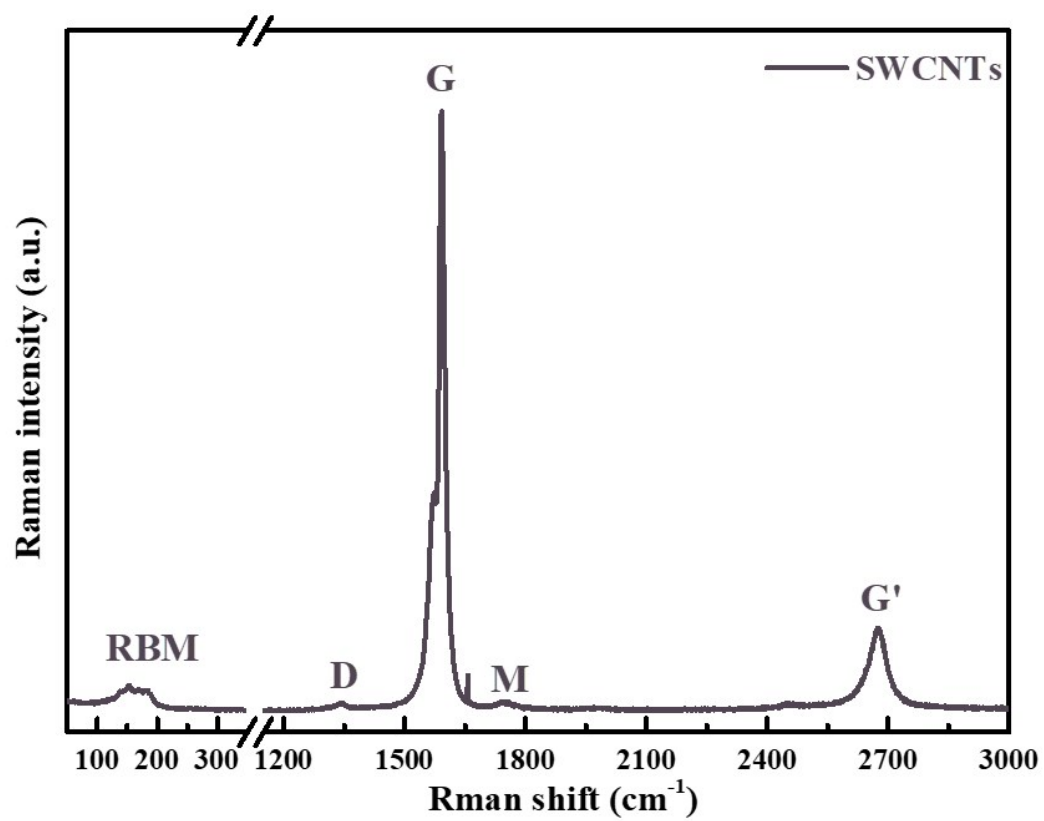

**Figure S2.** The Raman spectrum of SWCNTs.

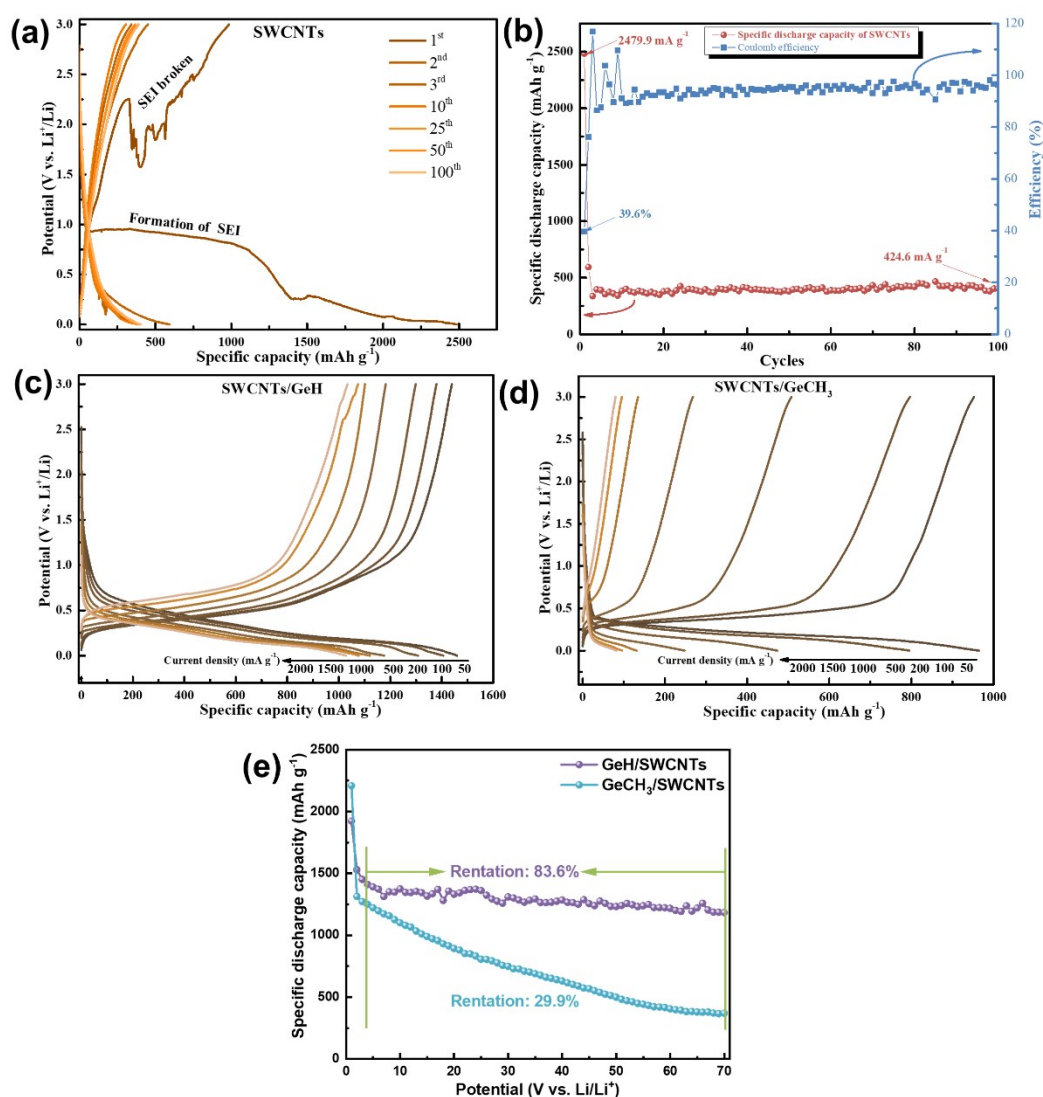

**Figure S3.** (a) and (b) Cycling performance of SWCNTs; C/DC curves of (c) GeH/SWCNTs and (d) GeCH<sub>3</sub>/SWCNTs at various current density; (e) cycling performance of GeH/SWCNTs and GeCH<sub>3</sub>/SWCNTs electrode at 200 mA g<sup>-1</sup>.

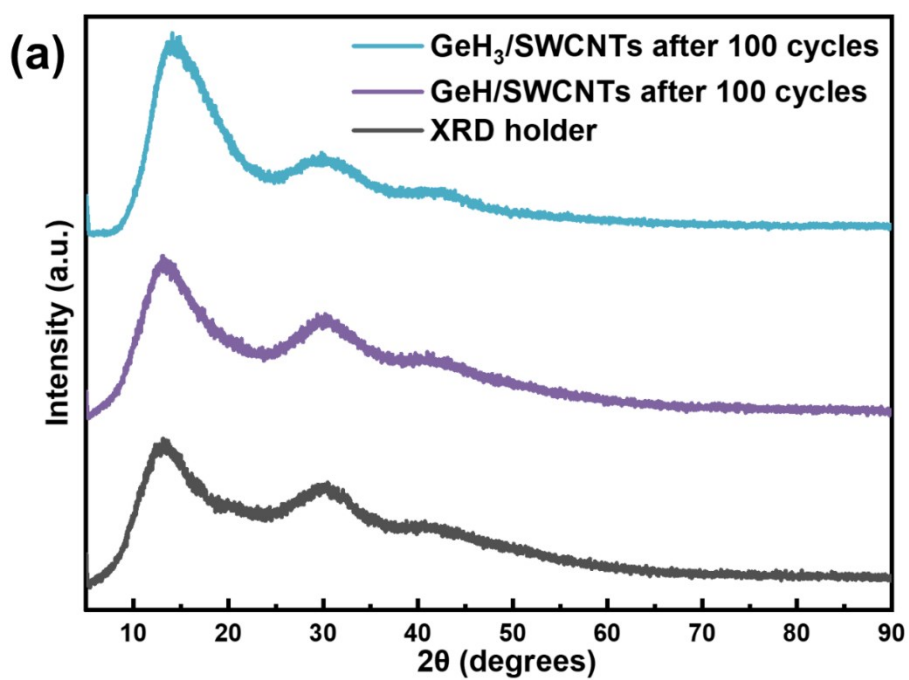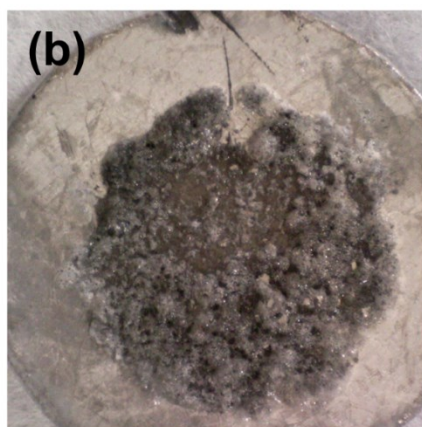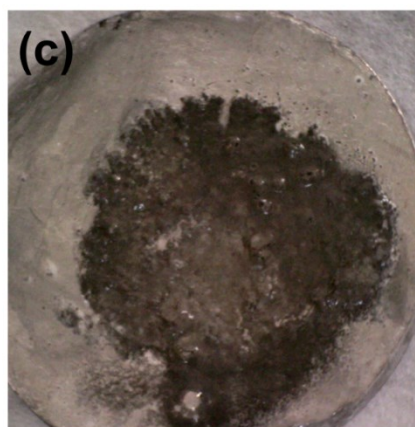

Figure S4. (a) XRD patterns of GeH/SWCNTs and GeCH<sub>3</sub>/SWCNTs electrode after 100 cyclings at 500 mA g<sup>-1</sup>; and the corresponding counter lithium-metal electrodes: (b) GeH/SWCNTs; (c) GeCH<sub>3</sub>/SWCNTs.

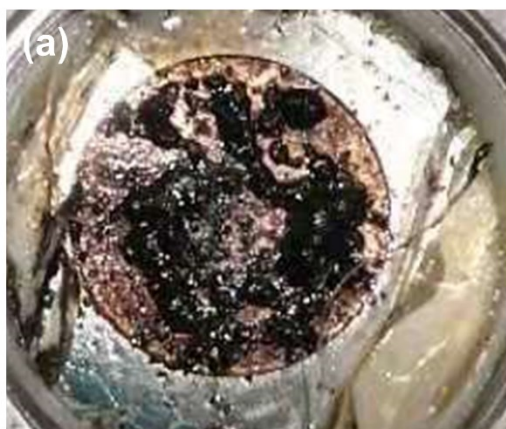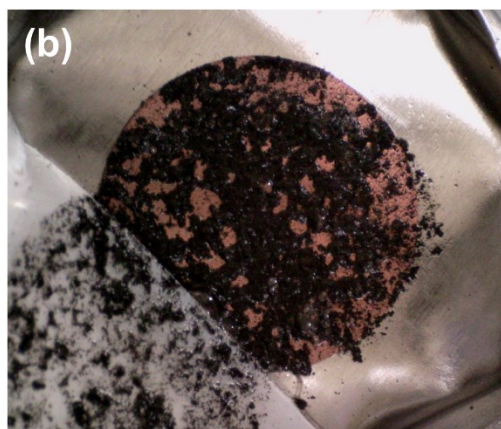

Figure S5 Images of as-prepared pure GeH and GeCH<sub>3</sub> electrodes after 100 cycles at 500 mAh g<sup>-1</sup>.
